# Supplementary material
Source: PubMed Central journal article supplement (PMC5880496)
Supplement: 10.1194_P079525_jlr.P079525-1.pdf [file 10.1194_P079525_jlr.P079525-1.pdf]

**SUPPLEMENTAL FIGURE S1**

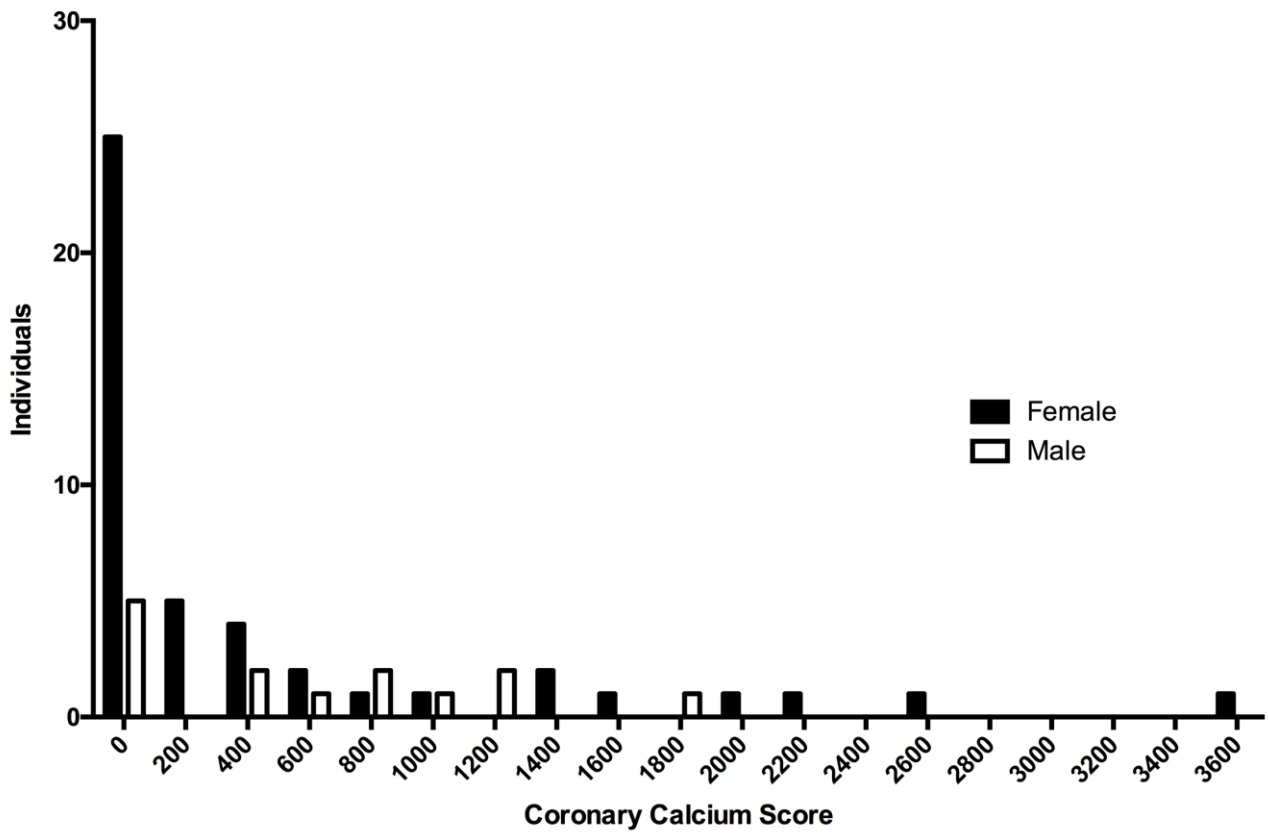

**Fig. S1.** Histograms of CAC values in female (dark bars) and male (white bars) subjects, created by nonlinear regression of the frequency distribution.

**SUPPLEMENTAL FIGURE S2**

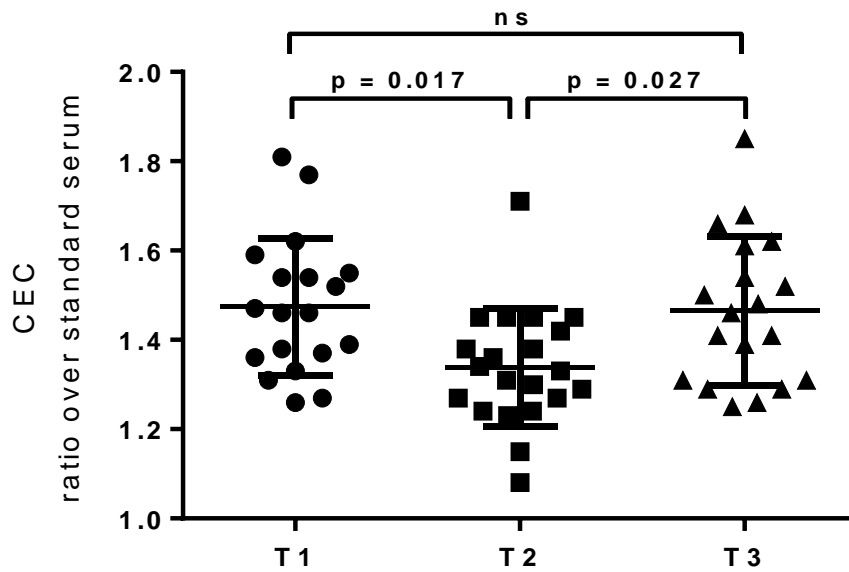

**Fig. S2. Stratification of CEC values according to tertiles (T) of CAC in elderly subjects.**

Each point represents the mean of CEC values obtained from an evaluation in triplicate of a serum sample.

CEC values are expressed as a ratio over a standard serum as described in Methods section. Statistical significance was calculated by one-way ANOVA with the Tukey's multiple comparisons test.

T1: n = 19; T2: n = 21; T3: n = 19.

**SUPPLEMENTAL FIGURE S3**

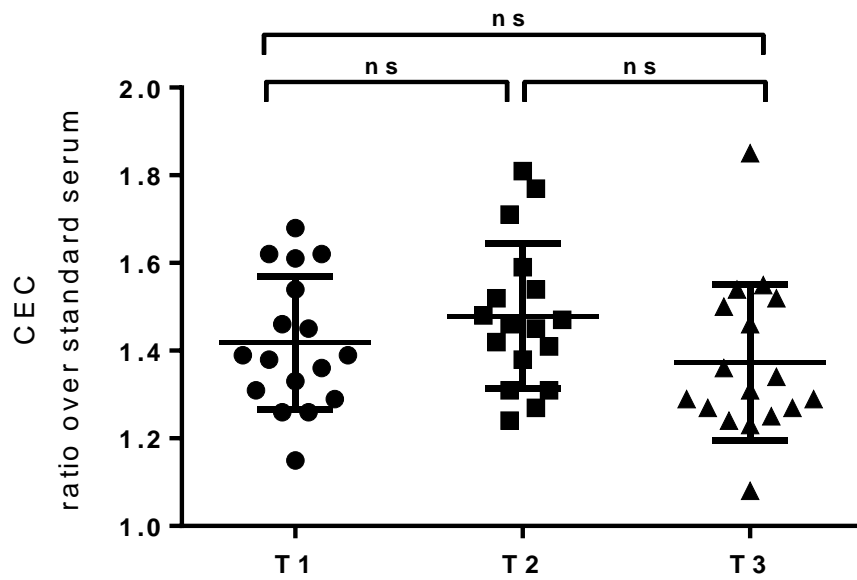

**Fig. S3. Stratification of CEC values according to tertiles (T) of telomere length (TL) in elderly subjects.**

Each point represents the mean of the values obtained from an evaluation in triplicate of a serum sample.

CEC values are expressed as a ratio over a standard serum as described in Methods section. Statistical significance was calculated by one-way ANOVA with the Tukey's multiple comparisons test.

T1: n = 17; T2: n = 17; T3: n = 17.

**SUPPLEMENTAL TABLE S1. Clinical characteristics and laboratory parameters of elderly subjects taking calcium supplements and bisphosphonate.**

|                                    |             |            |            |            |            |             |            |            |      |            |            |
|------------------------------------|-------------|------------|------------|------------|------------|-------------|------------|------------|------|------------|------------|
| <b>Subject ID</b>                  | 7           | 9          | 10         | 32         | 63         | 80          | 84         | 87         | 113  | 146        | 221        |
| <b>Age</b>                         | 90          | 80         | 82         | 85         | 84         | 88          | 91         | 89         | 80   | 82         | 80         |
| <b>Gender</b>                      | F           | M          | F          | F          | F          | F           | F          | F          | F    | F          | F          |
| <b>BMI (Kg/m<sup>2</sup>)</b>      | 22,5        | 28,3       | 19,4       | 24,5       | 26,3       | 18,8        | 22,1       | 35,3       | 30,0 | 18,9       | 24,7       |
| <b>SBP Mean (mmHg)</b>             | 135         | 143        | 163        | 142        | 154        | 124         | 127        | 145        | 159  | 125        | 133        |
| <b>DBP Mean (mmHg)</b>             | 70          | 69         | 79         | 75         | 90         | 81          | 67         | 74         | 93   | 66         | 55         |
| <b>Type II diabetes</b>            | yes         | yes        | no         | no         | no         | no          | no         | no         | yes  | no         | no         |
| <b>Bisphosphonate treatment</b>    | A<br>+C1000 | I<br>+C500 | R<br>+C500 | R<br>+C500 | I<br>+C500 | A<br>+C1000 | R<br>+C500 | R<br>+C500 | I    | A<br>+C500 | R<br>+C500 |
| <b>Lipid lowering treatment</b>    | yes         | yes        | no         | no         | no         | no          | no         | yes        | no   | no         | yes        |
| <b>CAC - AGATSTON Score</b>        | 6           | 648        | 77         | 0          | 72         | 14          | 0          | 164        | 0    | 2573       | 0          |
| <b>Positive remodeling plaques</b> | no          | no         | no         | no         | no         | no          | yes        | yes        | no   | no         | no         |
| <b>Hypodense plaques</b>           | no          | no         | no         | no         | yes        | no          | no         | yes        | no   | no         | no         |
| <b>Spotty calcified plaques</b>    | no          | no         | no         | no         | yes        | no          | no         | yes        | no   | no         | no         |
| <b>Napkin-Ring sign</b>            | no          | no         | no         | no         | no         | no          | no         | yes        | no   | no         | no         |
| <b>Total cholesterol (mg/dL)</b>   | 164         | 133        | 179        | 227        | 238        | 206         | 206        | 160        | 218  | 248        | 164        |
| <b>VLDL-C (mg/dL)</b>              | 23          | 11         | 17         | 41         | 32         | 24          | 30         | 29         | 30   | 11         | 25         |
| <b>LDL-C (mg/dL)</b>               | 73          | 56         | 97         | 119        | 135        | 106         | 115        | 64         | 142  | 151        | 55         |
| <b>Apo B (mg/dL)</b>               | 56          | 41         | 69         | 86         | 87         | 63          | 86         | 53         | 93   | 96         | 50         |
| <b>HDL-C (mg/dL)</b>               | 68          | 66         | 65         | 67         | 71         | 76          | 61         | 67         | 46   | 86         | 84         |
| <b>Apo AI (mg/dL)</b>              | 174         | 163        | 160        | 199        | 173        | 162         | 168        | 173        | 142  | 183        | 173        |

|                                                  |      |      |      |      |      |      |      |      |      |      |      |
|--------------------------------------------------|------|------|------|------|------|------|------|------|------|------|------|
| <b>Triglycerides (mg/dL)</b>                     | 133  | 71   | 108  | 119  | 127  | 88   | 114  | 108  | 182  | 104  | 44   |
| <b>Glucose (mg/dL)</b>                           | 112  | 87   | 84   | 98   | 108  | 102  | 72   | 90   | 128  | 83   | 102  |
| <b>Cholesterol efflux (ratio over standards)</b> | 1.55 | 1.29 | 1.45 | 1.52 | 1.30 | 1.36 | 1.46 | 1.33 | 1.54 | 1.46 | 1.27 |
| <b>Telomer lenght</b>                            | 131  | 110  |      | 222  |      | 174  | 67   |      | 65   | 108  | 91   |

A: Alendronate sodium 70mg/week; I: Ibandronate sodium 150mg/month; R: Risedronate sodium 35mg/month; C: calcium 500 or 1000mg/die.
